# Supplementary material for: Low-Dose Administration of Cannabigerol Attenuates Inflammation and Fibrosis Associated with Methionine/Choline Deficient Diet-Induced NASH Model via Modulation of Cannabinoid Receptor
Source: MDPI journal article supplement (doi:10.3390/nu15010178), 2022-12-30
Supplement: s1 [file s1]

Supplemental Figure S1

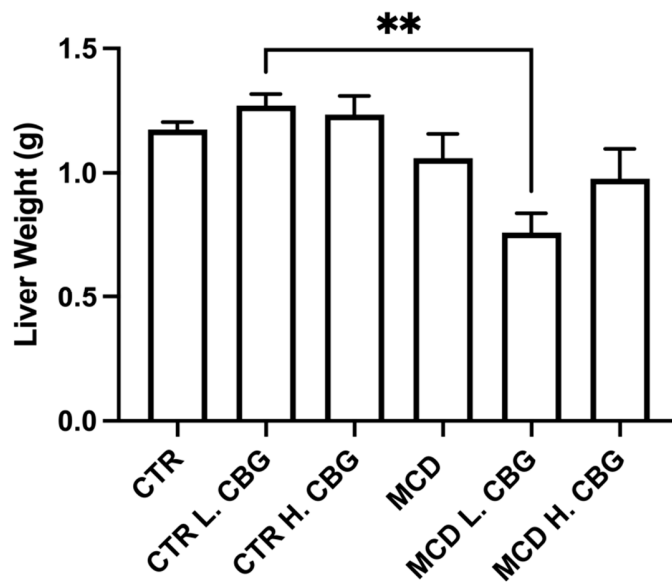

Supp Figure S1. Evaluating the overall health of mice or without NASH diet induction. The Liver weight was assessed after sacrifice. \*\*p<0.01

Supplemental Figure S2

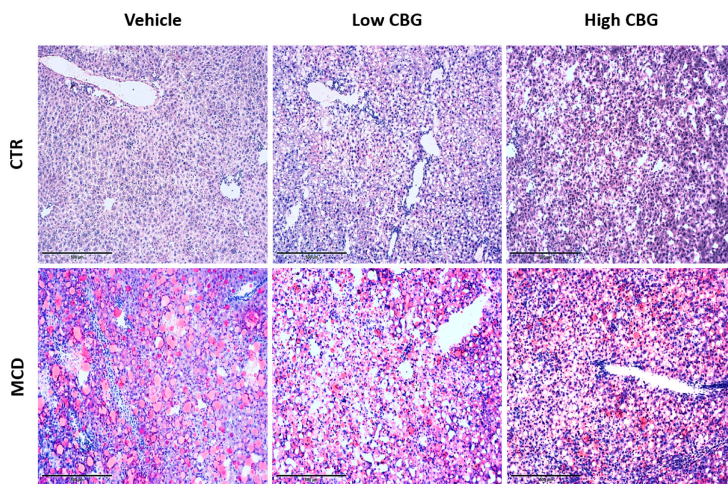

Supp figure S2. Evaluating steatosis. Representative images of Oil-Red-O staining (20X) illustrating fat deposition in frozen liver sections.
